# Supplementary material
Source: publisher figshare collection journal article supplement (https://acs.figshare.com/ndownloader/files/4365076)

Synthesis and Characterization of Boron  
Azadipyrromethene Single-Wall Carbon Nanotube  
Electron Donor-Acceptor Conjugates

*Kevin Flavin<sup>a</sup>, Katherine Lawrence<sup>b</sup>, Juergen Bartelmess<sup>b</sup>, Mariusz Tasior<sup>c</sup>, Cristina Navio<sup>d</sup>,  
Carla Bittencourt<sup>d</sup>, Donal O'Shea<sup>c</sup>, Dirk M. Guldi<sup>b</sup>, and Silvia Giordani<sup>a\*</sup>*

AUTHOR EMAIL ADDRESS

[giordans@tcd.ie](mailto:giordans@tcd.ie)

Scheme S1: Deprotection of Boc-protected [1].

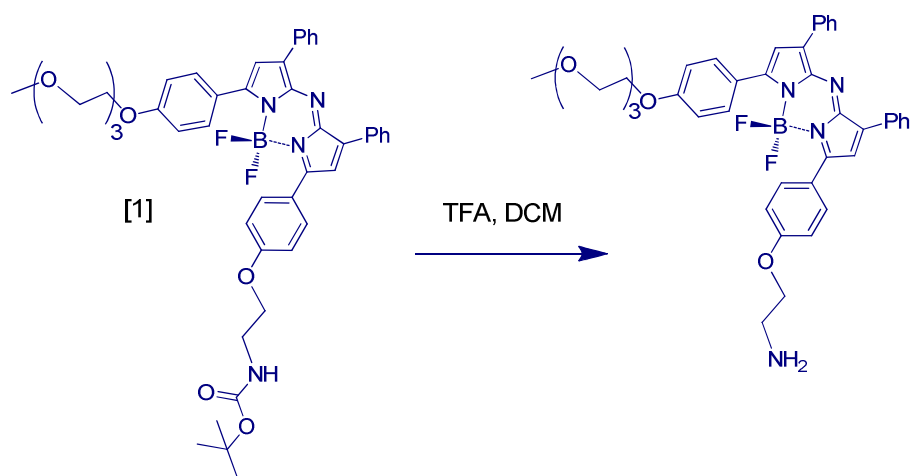

Table S1: XPS C 1s, O 1s, B 1s and N 1s data for [2-5] used for the estimation of efficiency of functionalisation reactions.

*r*-SWNTs [2]

| Name       | At. % | Atomic Ratio |
|------------|-------|--------------|
| <b>C1s</b> | 96.93 | 100.00       |
| <b>O1s</b> | 2.17  | 2.24         |

*p*-SWNTs [3]

| Name       | At. % | Atomic Ratio |
|------------|-------|--------------|
| <b>C1s</b> | 86.85 | 100.00       |
| <b>O1s</b> | 10.96 | 12.62        |

*f*-SWNTs [4]

| Name       | At. % | Atomic Ratio |
|------------|-------|--------------|
| <b>C1s</b> | 75.35 | 100.00       |
| <b>O1s</b> | 15.32 | 20.33        |

*f*-SWNTs [5]

| Name       | At. % | Atomic Ratio |
|------------|-------|--------------|
| <b>C1s</b> | 83.83 | 100.00       |
| <b>B1s</b> | 0.50  | 0.60         |
| <b>N1s</b> | 2.28  | 2.72         |

Table S2: Using atomic ratios for *f*-SWNT [4] (first column), by subtracting O 1s peak of *f*-SWNT [4] from *f*-SWNT [3] we could estimate the number of benzoic acid groups in the sample. We can subsequently estimate the relative amounts of carbon related to benzoic acid groups attached to the nanotube surface ( $C_{\text{attached}} = 7$  carbons per added 2 oxygen atoms) and from the nanotube body ( $C_{\text{nt}} = \text{total carbon amount after } C_{\text{attachment}} \text{ subtraction}$ ). We renormalized atomic ratios on benzoic acid (second column) and results indicated that there is one group attached every 18.4 carbon nanotube atoms.

| XPS Atomic Ratio                                                                                                    | <i>f</i> -SWNTs [4] | Atoms per benzoic acid group |
|---------------------------------------------------------------------------------------------------------------------|---------------------|------------------------------|
| <b>C 1s</b> <i>f</i> -SWNTs [4]                                                                                     | 100.0               | 26.3                         |
| <b>O 1s</b> <i>f</i> -SWNTs [4]                                                                                     | 20.3                | 5.3                          |
| <b>O 1s</b> <i>p</i> -SWNTs [3]                                                                                     | 12.6                | 3.3                          |
| <b>O 1s</b> <sub><i>f</i>-SWNTs [4]</sub> - <b>O 1s</b> <sub><i>p</i>-SWNTs [2]</sub> = <b>O 1s</b> <sub>Tour</sub> | 7.7                 | 2.0                          |
| <b>O 1s</b> <sub>Tour</sub> / 2 = number of benzoic acid groups                                                     | 3.8                 | <b>1.0</b>                   |
| <b>O 1s</b> <sub>Tour</sub> / 2 X 7 = <b>C</b> <sub>attached</sub>                                                  | 30.0                | 7.9                          |
| <b>C</b> <sub>total</sub> - <b>C</b> <sub>attached</sub> = <b>C</b> <sub>nt</sub>                                   | 70.0                | <b>18.4</b>                  |

Table S3: Using atomic ratios for *f*-SWNT [5] (first column), we could estimate from N 1s the quantity of [1] present in the sample. We can subsequently estimate the relative amounts of carbon related to the fluorophore groups attached to the nanotube ( $C_{\text{attached}} = 48C$  per attached fluorophore) and from the nanotube body ( $C_{\text{nt}} = \text{total carbon amount after } C_{\text{attachment}} \text{ subtraction}$ ). We renormalized atomic ratios on [1] (second column) and results indicated that there is one fluorophore attached every 99.1 carbon nanotube atoms.

| XPS Atomic Ratio                                                 | <i>f</i> -SWNTs [5] | Atoms per attached fluorophore |
|------------------------------------------------------------------|---------------------|--------------------------------|
| <b>C 1s</b> <i>f</i> -SWNTs [5]                                  | 100                 | 147.1                          |
| <b>N 1s</b> <i>f</i> -SWNTs [5]                                  | 2.7                 | 4.0                            |
| <b>N 1s</b> <i>f</i> -SWNTs [5] / 4 = number of molecules of [1] | 0.7                 | <b>1.0</b>                     |
| <b>number of dye molecules X 48C = C<sub>attached</sub></b>      | 32.6                | 47.9                           |
| <b>C<sub>total</sub> - C<sub>attached</sub> = C<sub>nt</sub></b> | 67.4                | <b>99.1</b>                    |

Table S3: Using atomic ratios for *f*-SWNT [5] (first column), we could estimate from the B 1s peak the quantity of boron present in the sample. We can subsequently estimate the relative amounts of carbon related to the boron chelated fluorophore groups attached to the nanotube ( $C_{\text{attached}} = 48C$  per attached fluorophore) and from the nanotube body ( $C_{\text{nt}} = \text{total carbon amount after } C_{\text{attachment}} \text{ subtraction}$ ). We renormalized atomic ratios on boron chelated [1] (second column) and results indicated that there is one fluorophore attached every 112.3 carbon nanotube atoms.

| XPS Atomic Ratio                                              | <i>f</i> -SWNTs [5] | Atoms per attached fluorophore |
|---------------------------------------------------------------|---------------------|--------------------------------|
| <b>C 1s</b> <i>f</i> -SWNTs [5]                               | 100                 | 166.7                          |
| <b>B 1s</b> <i>f</i> -SWNTs [5]                               | 0.6                 | 1.0                            |
| <b>B 1s</b> <i>f</i> -SWNTs [5] / 1 = number of dye molecules | 0.6                 | <b>1.0</b>                     |
| number of dye molecules X 48C = $C_{\text{attached}}$         | 32.6                | 54.3                           |
| $C_{\text{total}} - C_{\text{attached}} = C_{\text{nt}}$      | 67.4                | <b>112.3</b>                   |

Figure S1: Steady state absorption and emission spectra for raw, purified and functionalised SWNTs.

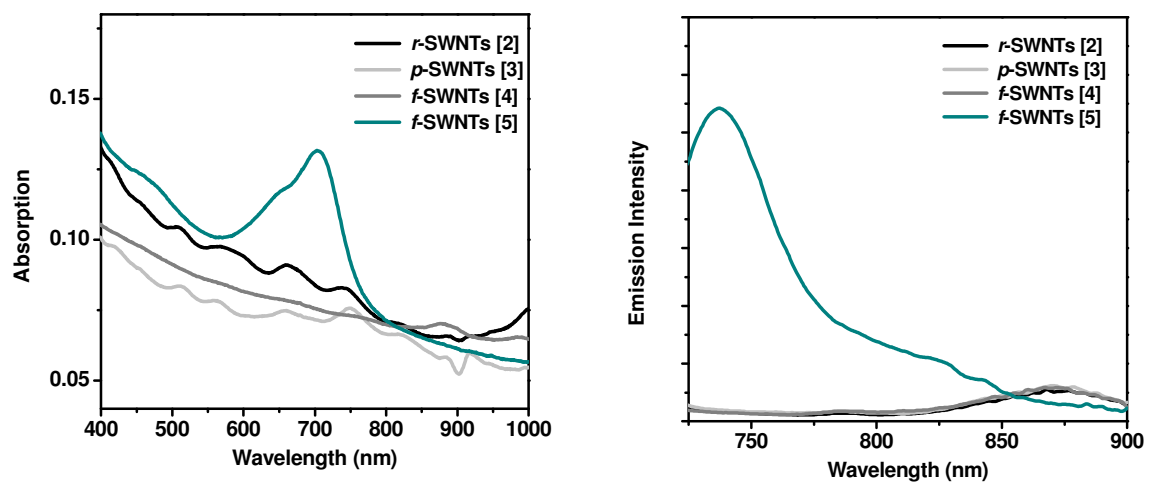

Supplement: Supplementary file 1 [file 4365076]
